1 **Zebrafish skeletal muscle cell cultures: Monolayer to three-dimensional tissue engineered collagen**  
2 **constructs**

3 Vishnolia, K.K.<sup>1,2</sup>, Martin, N.R.W.<sup>1</sup>, Player, D.J.<sup>1,3,§</sup>, Spikings, E.<sup>2</sup> and Lewis, M.P.<sup>1\*</sup>

4 <sup>1</sup> National Centre for Sport and Exercise Medicine (NCSEM), School of Sport, Exercise and Health Sciences,  
5 Loughborough University, UK

6 <sup>2</sup> Institute of Biomedical and Environmental Science and Technology (iBEST), University of Bedfordshire,  
7 Luton, UK

8 <sup>3,§</sup> Current Address: Division of Surgery and Interventional Science, University College London, UK.

9

10

11

12 Running title: 3D zebrafish skeletal muscle cells

13

14

15

16

17 Word count: 4950

18

19

20

21 **\*Corresponding Author**

22 Prof. Mark P. Lewis

23 Professor of Musculoskeletal Biology and Dean of School,

24 Dean of School of Sport, Exercise and Health Sciences,

25 Loughborough University, UK.

26 Email: [m.p.lewis@lboro.ac.uk](mailto:m.p.lewis@lboro.ac.uk)

27 Phone: +44 (0)1509 226430

28 **Abstract**

29 Zebrafish (*Danio rerio*) are a commonly used model organism to study human muscular myopathies and  
30 dystrophies. To date, much of the work has been conducted *in vivo* due to limitations surrounding the consistent  
31 isolation and culture of zebrafish muscle progenitor cells (MPCs) *in vitro* and the lack of physiologically  
32 relevant models.

33 Here we report a robust, repeatable, and cost-effective protocol for the isolation and culture of zebrafish MPCs  
34 in conventional monolayer (2D) and have successfully transferred these cells to 3D culture in collagen based  
35 three-dimensional (3D) tissue-engineered constructs. Zebrafish MPC's cultured in 2D were consistently  
36 reported to be Desmin positive reflecting their muscle specificity, with those demonstrating Desmin positivity in  
37 the 3D cultures. In addition, mRNA expression of muscle markers specific for proliferation, differentiation and  
38 maturation measured from both monolayer and 3D cultures at appropriate developmental stages were found  
39 consistent with previously published from other species *in vitro* and *in vivo* muscle data.

40 Collagen constructs seeded with zebrafish MPC's were initially characterised for optimal seeding density,  
41 followed by macroscopic characterisation (three-fold contraction) of the matrix. Direct comparison between the  
42 morphological characteristics (proportion of cells) and gene expression profiles of cells cultured in collagen  
43 constructs revealed higher maturation and differentiation compared to monolayer cultures. In this regard, cells  
44 embedded in 3D collagen constructs revealed higher fusion index, Desmin positivity, hypertrophic growth,  
45 myotube maturity and myogenic mRNA expression when compared to in monolayer.

46 In conclusion, these methods and models developed herein will facilitate *in vitro* experiments, which would  
47 complement *in vivo* zebrafish studies used to investigate the basic developmental, myopathies and dystrophies in  
48 skeletal muscle cells.

49

50 **Key words**

51 Zebrafish; *Danio rerio*; skeletal muscle; 3D tissue engineering; Collagen

52

53

54

55

56

57

58

59

## 60 Introduction

61 The advantages of using zebrafish (*Danio rerio*) as an animal model for the study of human diseases are  
62 numerous. These include a high weekly reproduction rate, visualisation of organogenesis due to optical  
63 transparency and a large degree of genetic homology with humans<sup>1-3</sup>. As such, a vast number of disease models  
64 have been established in zebrafish, which accurately represent the phenotypes associated with human disease<sup>4-10</sup>.

65 A number of studies comparing mammalian and teleost systems provide evidence to support the use of zebrafish  
66 as a model to study the mechanisms of human myogenesis<sup>11-13</sup>, postnatal muscle function<sup>14, 15</sup> and repair<sup>16, 17</sup>.  
67 Furthermore, it has been characterised that many of the same key signalling molecules are involved in these  
68 processes<sup>1</sup>. The work described here focuses on the isolation, characterisation, and culturing of zebrafish muscle  
69 precursor cells (MPCs), which are the progeny of satellite cells. These cells are skeletal muscle stem cells,  
70 which remain quiescent beneath the basal lamina of skeletal muscle fibres and play a vital role in repair,  
71 regeneration and growth of the tissue<sup>18</sup>. Upon injury, these cells proliferate extensively and undergo asymmetric  
72 cell division, which regulates the return to quiescence for a subset of cells, whilst a number of daughter cells  
73 terminally differentiate to form new muscle fibres or provide additional nuclei to existing fibres<sup>19</sup>. These  
74 mononuclear MPCs can be isolated through either tissue explant or enzymatic digestion and are routinely  
75 isolated from a number of mammals and teleosts e.g. salmon. Once isolated, MPCs can be subsequently cultured  
76 and used for *in vitro* experimentation, where cellular responses can be observed and manipulated in a highly  
77 controlled manner.

78 Norris et al. (2000) isolated blastomeres from zebrafish embryos (which in culture commit to form myoblasts)  
79 and studied the effect of Sonic Hedgehog signalling on the induction of a slow fibre fate, showing myotube  
80 formation after 48 hours in culture evidenced by myosin heavy chain expression<sup>20</sup>. Moreover, in 2011  
81 Alexander and colleagues for the first time demonstrated the isolation MPCs from adult zebrafish and used  
82 microarray analysis to investigate gene expression over the time course of MPC differentiation to form  
83 myotubes<sup>21</sup>. The authors showed increased levels of the myogenic regulatory factor *myogenin* across a 14-day  
84 culture period, along with elevated mRNA levels of the muscle specific cytoskeletal protein, Desmin. These  
85 data suggest that MPCs can be successfully isolated, differentiated and matured over time in monolayer<sup>21</sup>.  
86 Whilst these data are informative, there remains a need to provide extensive morphological characterisation of  
87 zebrafish MPCs as to how they are differentiated *in vitro*, which can be used alongside transcriptional data to  
88 provide a basis for the future use of zebrafish muscle cells in research. This is of importance when seeking to  
89 use zebrafish skeletal muscle cells to investigate mechanisms that regulate regeneration, hypertrophy, and  
90 atrophy.

91 Furthermore, to-date MPCs isolated from fish species have been limited to conventional monolayer culture,  
92 which does not account for the three-dimensional (3D) nature of skeletal muscle *in-vivo*<sup>22</sup>. Indeed, many of the  
93 myopathies studied in zebrafish are diseases whereby the interaction between the sarcolemma membrane and the  
94 extra-cellular matrix (ECM) is disturbed<sup>23</sup>. Thus, it is important to develop a model system whereby isolated  
95 MPCs and the extra-cellular matrix can be manipulated, to investigate their independent and connected roles in  
96 muscular dystrophies.

97 To further develop conventional monolayer cellular systems to understand the pathophysiological mechanisms  
98 downstream, tissue engineered 3D skeletal muscle models have been developed. Such models aim to recreate  
99 the native *in vivo* structure of muscle tissue, *in vitro*. Our group employs a collagen-based model, which is now  
100 extensively published in the literature across multiple mammalian species<sup>24-28</sup>. These data suggest that constructs  
101 display highly aligned and differentiated myotubes from human<sup>24</sup>, rat and immortal mouse cell line sources  
102 (C<sub>2</sub>C<sub>12</sub>)<sup>27, 29</sup>. However, this model is yet to be tested with cells derived from non-mammalian species, providing  
103 scope for its use with isolated zebrafish MPCs.

104 The aim of the present work was to isolate and culture MPC's derived from adult zebrafish and develop a  
105 collagen based 3D tissue engineered culture system that would allow these cells to form myotubes in a 3D  
106 formation that is more representative of their state *in vivo*. This information would allow for the routine  
107 utilisation of *in vitro* zebrafish muscle cell cultures and tissue engineered models, which could complement *in*  
108 *vivo* experimentation and shed further light on the cellular and molecular mechanisms underpinning skeletal  
109 muscle diseases in future.

110

## 111 **Methods**

### 112 *Zebrafish maintenance*

113 All the experiments were conducted as per the ethical animal welfare laws and guidelines from University of  
114 Bedfordshire, Luton, UK and were reviewed by the local ethical committee at the institute. Adult wildtype (AB-  
115 wildtype) zebrafish (10-12 months) were maintained in 40 litre (L) glass tanks at 28 °C. Male and female fish  
116 were housed together in tanks and were fed three times a day with TetraMin<sup>®</sup> (Tetra, Germany) flake food and  
117 once with freshly hatched brine shrimp (*Artemia* saline, ZM systems, UK).

### 118 *Isolation of skeletal muscle cells*

119 Building on a previously published method for the isolation of skeletal muscle cells from salmon<sup>30</sup>, a protocol  
120 for the isolation of zebrafish skeletal MPCs was developed. The in-house protocol selected was as follows; 15-  
121 20 adult zebrafish (6-12 months old, mixed gender) were collected and washed twice with distilled water.  
122 Zebrafish were sacrificed with a lethal dose of MS-222 (Ethyl 3-aminobenzoate methanesulfonate) (Sigma-  
123 Aldrich, UK), followed by washing with 0.5% sodium hypo chloride or bleach (Sigma-Aldrich, UK) diluted in  
124 double-distilled water (ddH<sub>2</sub>O) for 45 seconds to remove any contaminates/oils from the surface of fish. Bleach  
125 residues were removed from anaesthetised fish with three washes in phosphate-buffered saline (PBS). All internal  
126 organs and skin were removed on a sterile petri dish using a sterile scalpel. Further the soft muscle tissue (5  
127 grams per isolation) was moved to a biological safety cabinet and washed twice with PBS. Tissue was minced  
128 with sterile scalpels in a petri dish and subsequently incubated in a sterile 50 ml tube with 10 ml of 5 mg/ml  
129 collagenase type 1A solution (Sigma-Aldrich, UK) at room temperature for 45 minutes on a shaker at 200  
130 revolutions per minute (rpm). 20 ml of isolation media i.e. L15 medium supplemented with 0.8 mM calcium  
131 chloride (CaCl<sub>2</sub>), 2mM glutamine, 3 % fetal bovine serum (FBS), 100 µg/ml penicillin/ streptomycin (Sigma-  
132 Aldrich, UK) was added after incubation in order to stop the collagenase activity. Subsequently, the cell

133 suspension was filtered through 100 and 40  $\mu\text{m}$  nylon strainers (Fisher Scientific, UK). The filtrate was  
134 centrifuged at 1000 x g for 10 minutes and the supernatant was discarded. The pellet was re-suspended in 4 ml  
135 PBS prior to layering over 4 ml of Ficoll solution (GE Healthcare life sciences, UK) in a 15 ml centrifuge tube  
136 and centrifuged at 1400 x g for 45 minutes. Mononuclear cells were collected from the top of Ficoll layer and  
137 washed with PBS followed by re-suspension in 10 ml growth media i.e. L15 supplemented with 0.8 mM  $\text{CaCl}_2$ ,  
138 2mM glutamine, 20 % FBS, 100  $\mu\text{g/ml}$  penicillin/ streptomycin. Cells were counted using a haemocytometer  
139 and plated on coverslips pre-coated with 0.2% gelatin in six well plates. These were then cultured at 28 °C in a  
140 sterile tissue culture incubator.

141 Once the cells reached 90% confluency (approximately in three to four days), cells were pushed for  
142 differentiation to fuse and form multinucleated myotubes using low serum differentiation media i.e. L15  
143 supplemented with 0.8 mM  $\text{CaCl}_2$ , 2mM glutamine, 2 % horse serum, 100  $\mu\text{g/ml}$  penicillin/ streptomycin.

144 Morphological characterisation in monolayer was conducted on early formed myotube i.e. after 3-4 days in  
145 differentiation medium (time point denoted as “early myotubes”) and late-stage when ideally myotubes should  
146 be matured by aggregating more nuclei per myotube i.e. after 12-14 days in differentiation medium (time point  
147 denoted as “myotubes”). Morphological characteristics, fusion efficiency and Desmin positivity were computed  
148 from 20 different isolations and six randomly selected Desmin (for Desmin protein) and dapi (for nuclei)  
149 immune stained images per isolation.

#### 150 *Tissue engineered collagen constructs*

151 The collagen constructs used in the present study are based on previously published protocols from our group<sup>24</sup>,  
152 <sup>25, 27</sup>. Briefly, 3D collagen gels were formed by seeding isolated zebrafish MPCs at the required plating density  
153 (see results section) into a 1.5 ml collagen-10 x Minimal Essential Media (MEM) solution (collagen: First Link,  
154 Birmingham, UK; Minimal Essential Media [MEM], Fisher, UK) neutralised by sodium hydroxide (NaOH). 1.5  
155 ml total volume of collagen gel was divided in 1.3 ml collagen, 150  $\mu\text{l}$  of the MEM solution, followed with  
156 addition of cells at required density in 50  $\mu\text{l}$  volume. The neutralised solution was allowed to polymerise within  
157 a chamber between two fixed points for 15 minutes at 28°C. The two fixed points originated from a custom-  
158 made structure, termed floatation bars and A-frame. Floatation bars were constructed from small pieces (6 mm x  
159 9 mm) of polyethylene plastic mesh (Darice Inc, Strongsville, Ohio, US) tied with 0.3 mm diameter stainless-  
160 steel wire (Scientific Wire Company, Great Dunmow, UK). A-frame was constructed by bending a 0.7 mm  
161 stainless steel wire (Scientific Wire Company, Great Dunmow, UK) and fixing it in between the floatation bar.  
162 Sylgard barriers were used to divide the glass chamber and keep the collagen gels in confined space (20mm x  
163 12mm x 10mm) (Figure 1). Flotation bars and A-frames, along with the glass chambers and Sylgard barriers  
164 were sterilised before experimentation in 70% ethanol and UV light in a biological safety cabinet for 30  
165 minutes, respectively.

#### 166 *Immunohistochemistry*

##### 167 *Cells in monolayer*

168 Media was aspirated from the culture wells followed by two PBS washes. Cells were fixed for 10 minutes in  
169 50% PBS and 50% ice cold 1:1 methanol-acetone (Fisher Scientific, UK) solution and then exposed to 100%  
170 1:1 ice-cold methanol-acetone solution for a further 5 minutes. Subsequently, coverslips were removed from the  
171 wells and cells were treated for 45 minutes with 100 µl of blocking solution prepared using Tris Buffered Saline  
172 (TBS, pH 8.5), 5% goat serum (Sigma-Aldrich, UK) and 0.2% Triton-X 100 (Fisher Scientific, UK). Cells were  
173 then rinsed with TBS prior to overnight incubation with 100 µl of rabbit polyclonal, anti-Desmin (Ab86083,  
174 Abcam, UK) primary antibody at a dilution of 1 in 200 in TBS, 2% goat serum and 0.2% Triton-X 100. The  
175 following day after washing the coverslips three times with TBS, they were incubated in goat anti-rabbit IgG,  
176 TRITC (Abcam, UK) secondary antibody diluted at 1 in 200 with TBS, 2% goat serum and 0.2% Triton-X 100  
177 for one hour, followed by three washes with PBS. 4', 6-diamidino-2-phenylindole (DAPI) (Sigma- Aldrich, UK)  
178 was used to stain nuclei, diluted at 1 in 3000 in deionised water and incubated for 10 minutes, followed by three  
179 washes in PBS. Coverslips were finally mounted onto glass microscopic slides (Fisher Scientific, UK) using a  
180 drop of MOWIOL (Sigma-Aldrich, UK) mounting medium containing the anti-fade agent DABCO (Sigma-  
181 Aldrich, UK). The coverslips were viewed and imaged using an inverted laser scanning confocal microscope  
182 (Leica, UK).

183

#### 184 *Tissue engineered 3D collagen constructs*

185 Collagen tissue engineered constructs were fixed *in situ* like monolayer coverslips, but with an increased  
186 incubation time (20 minutes). Following fixation, gels were detached from their fixed points and mounted on  
187 poly-L-lysine coated microscope slides (Fisher Scientific, UK) and the constructs were ringed with PAP pen  
188 (Fisher Scientific, UK). Gels were whole mount stained following the same protocol used for monolayer  
189 cultures with the same antibodies. Constructs were blocked for three hours in the blocking solution, before being  
190 washed three times using TBS. The anti-Desmin primary antibody solution at 1 in 200 dilution, in a volume  
191 enough to submerge the gels, was pipetted on the gels and incubated overnight in a humidified chamber at room  
192 temperature to avoid evaporation of the antibody and drying of the constructs. Next day, primary antibody was  
193 removed, and the constructs were washed three times in TBS before incubating the gels for three hours in the  
194 goat anti-rabbit IgG, TRITC secondary antibody solution at 1 in 200 dilution. After secondary antibody  
195 incubation, the constructs were washed three times with PBS prior to the addition of DAPI for 30 minutes.  
196 Finally, constructs were washed three times in PBS before mounting with glass coverslips (Fisher Scientific,  
197 UK) using MOWIOL containing DABCO. Immuno-stained engineered constructs were imaged using an  
198 inverted confocal microscope (Leica, UK).

#### 199 *Gene expression analysis*

##### 200 *RNA extraction and PCR*

201 RNA was extracted at different time points throughout experiments using the TRIzol (Life technologies, UK)  
202 method, following the manufacturer's instructions. Cells in monolayer cultures were scraped and homogenised,  
203 whereas collagen constructs were homogenised using a hand-held stick homogeniser (IKA T10 Fisher  
204 Scientific, UK) after being washed several times in PBS. RNA (1 µg) was transcribed using the Precision

205 qScript Reverse Transcription Kit (Primerdesign Ltd, UK) according to the manufacturer's protocol and the  
206 cDNA was diluted 1:2 in molecular biology grade water (Sigma,UK). Gene expression analysis was performed  
207 by quantitative real time PCR on a RotorGene 6000 cycler (Corbett Research, UK) using a 72 well rotor. Gene  
208 expression data was generated from three different isolation cultures with three technical replicates for each  
209 isolation in monolayer or 3D collagen constructs. Relative gene expression data for each muscle marker was  
210 normalised against two house-keeping genes *efl $\alpha$*  and  *$\beta$ -actin* (Primer sequences are detailed in Table 1). All  
211 results are presented relative to a single designated control sample labelled as 'after isolation' using the Rotor  
212 Gene software (Version 1.7, Corbett research), as previously published by our group<sup>31</sup>.

213 Expression of different myogenic markers were measured at different stages of development and differentiation  
214 from both monolayer (time points labelled as sub-confluent, confluent, early myotubes and myotubes) and 3D  
215 tissue engineered collagen constructs (time points labelled as before differentiation and myotube stage).  
216 Expression of myogenic regulatory factors *myoD*, *myogenin*, *myf6*, along with myogenic inhibitor *myostatin*,  
217 hypertrophic gene insulin like growth factor-1 (*igf-1*), slow (*smyhcl*) and fast isoform of myosin heavy chain  
218 (*myhc4*), were investigated.

#### 219 *Statistical analysis*

220 A one sample Kolmogorov-Smirnov statistical test was used to determine the normality of data from all the  
221 replicates (where necessary after logarithmic [ $\log_{10}$ ] transformation). One-way ANOVA with Bonferroni post-  
222 hoc correction was used to determine any statistical differences among time points and conditions investigated.  
223 Data are expressed as mean  $\pm$  standard deviation, with significance set at  $p < 0.05$ .

224

## 225 **Results**

### 226 *Monolayer culture: Isolation and culture conditions of zebrafish MPCs*

227 Enzymatic digestion of 5 grams muscle tissue from 15- 20 adult zebrafish (both male and female) in 5 mg/ml  
228 type 1 collagenase resulted in an average cell yield of  $14.8 \times 10^6 \pm 1.4 \times 10^6$  cells. Approximately 300,000  
229 cells/well were plated in six well plates. Increase or replication of cells can be evidently observed from the  
230 immuno-stained images in Figure 2 where cells are scattered at day 1 (Fig 2-A), whereas they are almost 90%  
231 confluent at day 4 (Fig 2-B). Myogenic purity or Desmin positivity of this cell population was determined to be  
232  $42 \pm 7.80\%$  at day 1. Early myotubes (2-3 nuclei) were observed after 3-4 days of switching to differentiation  
233 media (Figure 2-C) confirming the fusion capacity of isolated cells. Matured myotubes with increased number  
234 of nuclei per/myotube were observed after 12-14 days in differentiation media (Figure 2-D). Of note, we were  
235 successfully able to passage and/or freeze-thaw and sub-culture the zebrafish MPC's, however all the data  
236 included in this study was generated from primary cell cultures.

237 To further analyse differentiation of zebrafish MPCs at the molecular level, we measured the mRNA expression  
238 of the muscle regulatory factors *myoD*, *myogenin* and *myf6*. *myoD* mRNA levels were significantly increased in  
239 confluent cells (3-4 days after plating) compared to sub-confluent cultures (1 day after plating) ( $1.62 \pm 0.18$  vs  
240  $1.16 \pm 0.17$ ,  $p < 0.05$ ), and were further augmented in early myotubes (3-4 days in differentiation media)

241 compared to all time points ( $4.85 \pm 0.56$ ,  $p < 0.0001$ ), before attenuating towards basal levels in myotubes stage  
242 (12-14 days in differentiation media) ( $1.61 \pm 0.30$ ) (Figure 3). A similar pattern was observed for *myogenin*  
243 expression, which significantly increased as cells transitioned from sub-confluence ( $0.07 \pm 0.01$ ;  $p < 0.05$ ) to  
244 confluence ( $0.18 \pm 0.02$ ;  $p < 0.05$ ) respectively, then to early myotubes ( $3.02 \pm 0.32$ ;  $p < 0.0001$ ) and then  
245 reduced in later myotubes ( $0.78 \pm 0.12$ ;  $p < 0.0001$ ) (Figure 3). *myf6* expression increased more dramatically  
246 from sub-confluence ( $0.62 \pm 0.08$ ) to confluence ( $1.94 \pm 0.21$ ,  $p < 0.05$ ) before further augmenting in early  
247 myotubes ( $5.44 \pm 0.44$ ,  $p < 0.0001$ ) and remaining elevated in myotubes ( $4.38 \pm 0.75$ ) (Figure 3). These results  
248 confirm that the zebrafish MPCs were committing to the myogenic lineage and undergoing fusion to form  
249 myotubes. Furthermore, these data support the roles of the measured myogenic regulatory factors in the  
250 specification of MPCs in early and late MPC differentiation in the zebrafish.

#### 251 *Morphological characterisation of myotubes in monolayer*

252 At early and late time points during MPC differentiation, myotubes were fixed and stained for Desmin protein  
253 and nuclei, to visualise cellular morphology (Figure 2A-D). Desmin positivity of a culture does not necessarily  
254 define the fusion capability of muscle cells in culture therefore fusion efficiency per isolation was quantified.  
255 Fusion efficiency was measured as a ratio between number of nuclei incorporated in myotubes and total number  
256 of Desmin positive nuclei. The overall fusion efficiency of the myogenic cells revealed that approximately 60%  
257 of myogenic positive cells in the cultures were able to form myotubes (Table 2), which remained consistent over  
258 time in culture. Similarly, the number of myotubes per image did not significantly change with time in  
259 differentiated cultures, was approximately six myotubes per image (Table 2). Interestingly, whilst overall levels  
260 of fusion did not change, both the length ( $360.92 \pm 7.55$  vs  $336.87 \pm 7.01\mu\text{m}$ ) and width ( $10.80 \pm 0.27$  vs  $8.30 \pm$   
261  $0.21\mu\text{m}$ ) of myotubes were significantly increased in later myotubes versus early myotubes ( $p < 0.05$ , Table 2).  
262 This suggests a degree of maturation and/or muscle growth during this period, which is mediated through  
263 increased protein accretion independent of myonuclear addition. To confirm this hypothesis, we generated a  
264 frequency distribution of myotubes containing various myonuclear densities at early and late myotube stages  
265 (Figure 4). Indeed, whilst there exists a small tendency for greater frequency of myotubes with increased nuclei  
266 in late myotubes, there was no significant interaction effect ( $p=0.415$ ), therefore confirming that increases in  
267 myonuclear number are not significant in late versus early myotubes.

#### 268 *Myosin Heavy Chains (MyHC) mRNA expression in monolayer*

269 Myosin heavy chains form the thick filament within the contractile apparatus in skeletal muscle, where the  
270 expression of MyHC isoforms is different throughout the stages of development and maturation. We measured  
271 the expression of both, fast (*fmyhc4*) and slow myosin heavy chain (*smyhc1*) mRNA during the culture of  
272 zebrafish MPCs *in vitro*. *fmyhc4* expression did not increase significantly in cells from sub-confluence ( $0.04 \pm$   
273  $0.006$ ) to confluence ( $0.072 \pm 0.008$ ,  $p > 0.99$ ) but reached its peak expression in early myotubes ( $0.72 \pm 0.08$ ,  
274 with  $p < 0.0001$ ) before levels attenuated in late myotubes ( $0.15 \pm 0.024$ ,  $p < 0.0001$ ) (Figure 3). *smyhc1*  
275 remained expressed at low levels in sub-confluent ( $0.025 \pm 0.002$ ) and confluent cells ( $0.028 \pm 0.004$ ) with no  
276 significant difference before increasing dramatically in early myotubes ( $1.72 \pm 0.20$ ,  $p < 0.0001$ ) and thereafter  
277 reducing ( $0.30 \pm 0.04$ ,  $p < 0.0001$ ) (Figure 3).



278 *Tissue engineered constructs: Zebrafish MPC morphology in 3D*

279 Following characterisation in monolayer, freshly isolated zebrafish MPCs were seeded into 3D collagen  
280 constructs. Seeding density was optimised by plating the collagen gels at a range of seeding densities i.e. 4, 6, 8,  
281 10 and 12 million cells/ml. Few cells were observed in phase contrast images of collagen gels seeded at 4, 6 and  
282 8 million cells/ml, suggesting not enough adherent cells (Supplementary figure 1). Collagen gels seeded with 12  
283 million cells/ml were found to be detaching from the anchor points or A-frames after first or second day in  
284 culture (data not shown). However, plating density of 10 million cells/ml showed optimum results in terms of  
285 maximum number of cells observed in phase contrast images and later confirmed with Desmin staining. Like  
286 monolayer, collagen gels seeded with zebrafish MPC's were initially cultured in growth media for three to four  
287 days, before being switched to differentiation media after confirming their confluency.

288 Collagen gels seeded with 10 million cells/ml evidently demonstrated characteristic contraction in the width (gel  
289 bowing or contracting from the sides) over time as shown in Figure 5A-B. This phenomenon has already been  
290 reported in literature using different cell types and formats of collagen hydrogels<sup>18, 24, 27, 32</sup>. Contraction of  
291 collagen matrix width embedded with zebrafish MPCs was macroscopically documented over the course of 12  
292 days i.e. from day 1 (Figure 5-A) till day 12 after differentiation (Figure 5-B) time points.

293 Tissue engineered collagen gels seeded with zebrafish MPC's stained for Desmin before differentiation (day 1  
294 in culture), revealed only single or mononuclear cells (Figure 6-A). In contrast, post differentiation  
295 immunostaining demonstrates multinucleated, unidirectional bundles of myotubes, as confirmed in Figure 6-B.  
296 The number of myotubes per microscopic frame from Desmin stained 3D collagen constructs (20  
297 images/construct, n=6 collagen constructs), showed a significant increase from 1.55 ( $\pm$  0.40) at differentiation  
298 stage to 19.11 ( $\pm$  0.50) at 5 days post differentiation ( $p < 0.05$ , Figure 6C). Significantly higher number of  
299 myotubes were found aggregated with 5, 6, 7 and 8-8+ nuclei per myotubes at 5 days post differentiation time  
300 point, suggesting maturation of myotubes in the collagen constructs ( $p < 0.05$ , Figure 6D). Also, significant  
301 increment of fusion efficiency was observed in the collagen constructs i.e. 82% compare to monolayer i.e. 60%  
302 ( $p < 0.05$ , Figure 6E).

303 *Gene expression analysis in 3D collagen constructs*

304 Gene expression analysis was conducted using a sample of MPCs just after isolation, as an external control. The  
305 greater number of myotubes present at the post differentiation time point was underpinned by a greater  
306 expression of myogenic genes. There was a significant increase in the expression of *myoD*, *myogenin*, and *myf6*  
307 following differentiation compared to pre-differentiation ( $p < 0.05$ , Figure 7), demonstrating the activation of  
308 these genes required for the differentiation and maturation process. When comparing the myosin heavy chain  
309 mRNA response in 3D compared to monolayer culture, only *smyhc1* showed a significant increase following  
310 differentiation ( $p < 0.05$ , Figure 7), while no difference was observed for *fmyhc4* ( $p > 0.05$ , Figure 7). This  
311 suggests the myosin heavy chain response is specific and dependent on the culture type.

312 **Discussion**

313 Although the protocol for the isolation of zebrafish skeletal muscle progenitor cells from muscle tissue has been  
314 reported by Alexander et al, 2011<sup>21</sup>, further characterisation of the morphology and myogenic gene expression is  
315 required. Furthermore, we sought to establish a zebrafish 3D culture model based on previous work of the group  
316 in cells derived from other species.

317 In the present work, we isolated a yield of approximately 14 million cells per isolation from 5 grams soft muscle  
318 tissue (15- 20 adult zebrafish). Isolated cells warranted characterisation to ascertain whether myogenic cells  
319 were contained within the heterogeneous population. Approximately  $42 \pm 7.80\%$  of the isolated cells were found  
320 to be Desmin positive, indicating myogenic potential in culture. The initial proportion is not as high as with  
321 other published protocols for different species, but both the culturing system in monolayer and 3D constructs  
322 allowed for replication and differentiation of these cells into myotubes in line with published literature from our  
323 group from different species and cell lines<sup>29</sup>. Primary cultures of MPCs typically result in varying levels of  
324 myogenic purity owing to several variables such as age, duration of enzymatic digestion, extent of tissue  
325 trituration, cell straining conditions to remove debris and centrifugation speed<sup>32,33</sup>. Previously reported zebrafish  
326 cultures reported *myoD* mRNA expression levels of approximately 75% in isolated cells<sup>21</sup>, whilst human MPCs  
327 can range from 15-85% Desmin positivity<sup>32,34</sup>. The isolated cellular population using the current protocol does  
328 not differentiate between cell types, therefore a heterogeneous population is isolated. Other than myogenic cells,  
329 it is likely that most of the non-myogenic population consists of lineages originating from the extracellular  
330 matrix. Future experimentation should seek to investigate whether different fractions of cell types (i.e. myogenic  
331 vs. non-myogenic<sup>32</sup>), would influence myotube formation.

332 Pure myogenic fraction of cells per isolation can be obtained after replicating and passaging them in monolayer  
333 and implementing various different techniques reported in the literature such as flow cytometry<sup>35</sup>, cell sorting,  
334 magnetic cell sorting<sup>32</sup>, differential cell plating<sup>36</sup> and fractionation using Percol/ Ficol density gradient<sup>33</sup>. In  
335 conventional monolayer cell culturing, cells are already removed from their physical *in vivo* environment,  
336 therefore it becomes of increasing significance to move towards more biomimetic models for tissue culturing<sup>32</sup>.

337 Seeding densities play a crucial role in monolayer as well as three-dimensional tissue engineered constructs to  
338 allow sufficient cell-cell interaction, which is required for fusion<sup>34</sup>. Here, we observed that 1.5 ml collagen  
339 constructs seeded with 2, 4, 6, 8 million cells/ml did not adhere with the surrounding collagen, whilst constructs  
340 seeded with 12 million cells/ml detached from anchor points. However, cells seeded with 10 million cells/ml  
341 showed significant contraction of the gels over time and most importantly presence of straight, multi-nucleated  
342 bundles of aligned myotubes (Figure 6). Previous findings from our group using human MPCs at different  
343 plating densities in an acute cyto-mechanical model (culture force monitor), demonstrate the difference in cell-  
344 cell and cell-matrix interactions at different seeding densities<sup>34</sup>. The differences in cell-cell and cell-matrix  
345 interactions, may offer an explanation for the differences observed at different seeding densities presented here.

346 **In zebrafish, bundles of multinucleated muscle fibres are arranged in parallel allowing movement and to sustain**  
347 **multimodal swim due to their contractile properties**<sup>13</sup>. In 3D collagen constructs zebrafish MPC's are provided  
348 with similar *in vivo* niche held between two fixed points. Isometric tension is formed between the fixed points  
349 due to contraction of cells as they attach to the matrix leading to generate mechanical stimuli facilitating  
350 reorganisation and alignment of myoblasts along lines of principle strain<sup>24</sup>. To further characterise and

351 understand the molecular signals driving the differentiation of zebrafish MPCs, mRNA levels of the muscle  
352 regulatory factors *myoD*, *myogenin* and *myf6* were determined in isolated MPCs as they proliferated and  
353 underwent fusion. We showed a clear increase in the expression of all myogenic regulatory genes when  
354 differentiation was initiated in both monolayer and 3D, and a subsequent reduction in *myoD* and *myogenin*  
355 mRNA levels as myotubes matured in monolayer, whereas *myf6* expression remained elevated. These data  
356 match with those previously reported across species, showing that *myoD* is expressed in proliferating MPCs and  
357 is required for myogenic determination, and thereafter *myogenin* is important for terminal differentiation to form  
358 myotubes<sup>37</sup>. Furthermore, *myf6* levels which in the present work remained elevated in monolayer once fusion  
359 had occurred, have previously been shown to be expressed highly in post-regenerative muscle<sup>38</sup>.

360 Immuno-cytochemical analysis of the developed myotubes in early and late phases of monolayer culture clearly  
361 indicated that whilst no further cellular fusion occurred over time in culture, there were increases in myotube  
362 size (length and width). Further analysis of myonuclear quantity showed that nuclear accretion did not occur in  
363 myotubes over time. Therefore, this would suggest that increased myotube area was a product of growth,  
364 independent of cellular fusion. Increased growth of muscle fibres or myotubes can indeed occur without the  
365 need for myonuclear addition, through a net increase in protein synthesis<sup>39</sup>, however it is likely that extreme  
366 increases in muscle size will require new myonuclei in order to maintain the levels of transcription required for  
367 additional growth<sup>39-41</sup>. Approximately 60% fusion index in monolayer and 82% in 3D collagen hydrogels,  
368 suggests that a substantial number of myogenic cells remain un-differentiated in monolayer cultures. In contrast,  
369 over 82% of myogenic cells were able to differentiate and form multi nucleated myotubes, with much higher  
370 numbers of nuclei per myotube when cultured in more bio-mimetic 3D collagen constructs. Overall,  
371 improvement in hypertrophic growth, fusion efficiency, and alignment of zebrafish MPC's in the physiological  
372 environment provided by 3D collagen constructs proves significant advancement over conventional monolayer  
373 culture system. With the stark differences in fusion and growth between the two models, it will be possible to  
374 investigate the physiological proportions of other cell types that contribute to ECM maintenance and the  
375 underlying functional mechanisms which prevail in zebrafish models of dystrophy.

376 Finally, we measured mRNA levels of the fast and slow myosin heavy chain isoforms throughout MPC  
377 differentiation in both monolayer and 3D, as an indication of levels of myotube maturation. We found the  
378 expression of both isoforms increased during myotube differentiation in monolayer, whilst only *smyhcl*  
379 increased in 3D following differentiation, suggesting a predominance of this myosin heavy chain exclusive to  
380 the 3D environment. The increase in expression of the *smyhcl* in the collagen model, despite no increase in  
381 *fmyhc*, was in line with previous literature from our group, suggesting the myosin heavy chain expression may  
382 be dependent on the fixed 3D nature of the collagen<sup>34</sup>. It has previously been shown that during zebrafish  
383 myogenesis *in vivo*, embryonic slow muscle fibres co-express fast and slow myosin heavy chain isoforms before  
384 reaching full maturity<sup>14</sup>, and therefore the expression of both isoforms in monolayer is not unexpected.  
385 Furthermore, MPCs were isolated from a pooled muscle homogenate rather than a specific muscle fibre of  
386 slow/fast type, and therefore would likely contain a mixture of fibre types with associated MPCs, contributing to  
387 the expression of both fast and slow myosin heavy chains.

388 In conclusion, our study confirms that MPCs can be successfully isolated from zebrafish with myogenic  
389 capacity, replicating, growing, and differentiating *in vitro*. Moreover, these cells are capable of incorporation

390 into a 3D tissue engineered collagen-based culture system where they have been shown to differentiate more in  
391 line with expectations based on markers expressed *in vivo* than their 2D cultured counterparts. The  
392 characterisation and establishment of zebrafish skeletal muscle 3D culture system will facilitate to complement  
393 several *in vivo* experiments conducted on zebrafish investigating skeletal muscle development, understand  
394 functional mechanisms, high throughput drug screening and disease modelling.

#### 395 **Acknowledgements:**

396 We would like to acknowledge all the support provided by Dr. Jonathan McDermid, University of Leicester, UK  
397 for helping us with keeping and maintenance of zebrafish. We would also like to acknowledge Prof. Vivek  
398 Mudera from UCL, and our colleagues from Loughborough University for the critical discussions of project.

#### 399 **Author Contributions:**

400 KV conceived, designed, performed, collected data, and wrote the manuscript. DP, NM contributed to critical  
401 analysis of data, manuscript revisions. ES, ML supervised the project, critically analysed the data, reviewed the  
402 manuscript, and helped in designing initial concept of project.

#### 403 **Conflict of Interest:**

404 None

405

#### 406 **References**

- 407 1. Howe K, Clark MD, Torroja CF, Torrance J, Berthelot C, Muffato M, et al.: The zebrafish reference  
408 genome sequence and its relationship to the human genome. *Nature*. 2013;496:498-503.
- 409 2. Rubinstein AL: Zebrafish: from disease modeling to drug discovery. *Current Opinion in Drug  
410 Discovery and Development*. 2003;6:218-23.
- 411 3. Woods IG, Kelly PD, Chu F, Ngo-Hazelett P, Yan Y-L, Huang H, et al.: A comparative map of the  
412 zebrafish genome. *Genome research*. 2000;10:1903-14.
- 413 4. Baker K, Warren KS, Yellen G, Fishman MC: Defective “pacemaker” current (I<sub>h</sub>) in a zebrafish  
414 mutant with a slow heart rate. *Proceedings of the National Academy of Sciences*. 1997;94:4554-9.
- 415 5. Brownlie A, Donovan A, Pratt SJ, Paw BH, Oates AC, Brugnara C, et al.: Positional cloning of the  
416 zebrafish sauternes gene: a model for congenital sideroblastic anaemia. *Nature genetics*. 1998;20:244-50.
- 417 6. Drummond IA: Kidney development and disease in the zebrafish. *Journal of the American Society of  
418 Nephrology*. 2005;16:299-304.
- 419 7. Stainier D, Fouquet B, Chen J-N, Warren KS, Weinstein BM, Meiler SE, et al.: Mutations affecting the  
420 formation and function of the cardiovascular system in the zebrafish embryo. *Development*. 1996;123:285-92.
- 421 8. Gibert Y, Trengove M, Ward A: Zebrafish as a genetic model in pre-clinical drug testing and  
422 screening. *Current medicinal chemistry*. 2013;20:2458-66.
- 423 9. Guyon JR, Steffen LS, Howell MH, Pusack TJ, Lawrence C, Kunkel LM: Modeling human muscle  
424 disease in zebrafish. *Biochimica et Biophysica Acta (BBA)-Molecular Basis of Disease*. 2007;1772:205-15.
- 425 10. Palstra AP, Tudorache C, Rovira M, Brittijn SA, Burgerhout E, van den Thillart GE, et al.: Establishing  
426 zebrafish as a novel exercise model: swimming economy, swimming-enhanced growth and muscle growth  
427 marker gene expression. *PLoS One*. 2010;5:e14483.
- 428 11. Coutelle O, Blagden CS, Hampson R, Halai C, Rigby PW, Hughes SM: Hedgehog signalling is  
429 required for maintenance of myf5 and myoD expression and timely terminal differentiation in zebrafish adaxial  
430 myogenesis. *Developmental biology*. 2001;236:136-50.
- 431 12. Hinitz Y, Osborn DP, Hughes SM: Differential requirements for myogenic regulatory factors  
432 distinguish medial and lateral somitic, cranial and fin muscle fibre populations. *Development*. 2009;136:403-14.

- 433 13. Rossi G, Messina G: Comparative myogenesis in teleosts and mammals. *Cellular and Molecular Life*  
434 *Sciences*. 2014;71:3081-99.
- 435 14. Bryson Richardson R, Daggett D, Cortes F, Neyt C, Keenan D, Currie P: Myosin heavy chain  
436 expression in zebrafish and slow muscle composition. *Developmental Dynamics*. 2005;233:1018-22.
- 437 15. Chen F, Yuan W, Mo X, Zhuang J, Wang Y, Chen J, et al.: Role of Zebrafish *fh11A* in Satellite Cell  
438 and Skeletal Muscle Development. *Current molecular medicine*. 2017;17:627-36.
- 439 16. Seger C, Hargrave M, Wang X, Chai RJ, Elworthy S, Ingham PW: Analysis of Pax7 expressing  
440 myogenic cells in zebrafish muscle development, injury, and models of disease. *Developmental Dynamics*.  
441 2011;240:2440-51.
- 442 17. Zhang H, Anderson JE: Satellite cell activation and populations on single muscle-fiber cultures from  
443 adult zebrafish (*Danio rerio*). *Journal of Experimental Biology*. 2014;217:1910-7.
- 444 18. Cheema U, Yang SY, Mudera V, Goldspink G, Brown R: 3D in vitro model of early skeletal muscle  
445 development. Cell motility and the cytoskeleton. 2003;54:226-36.
- 446 19. Yin H, Price F, Rudnicki MA: Satellite cells and the muscle stem cell niche. *Physiological reviews*.  
447 2013;93:23-67.
- 448 20. Norris W, Neyt C, Ingham PW, Currie PD: Slow muscle induction by Hedgehog signalling in vitro. *J*  
449 *Cell Sci*. 2000;113:2695-703.
- 450 21. Alexander MS, Kawahara G, Kho AT, Howell MH, Pusack TJ, Myers JA, et al.: Isolation and  
451 transcriptome analysis of adult zebrafish cells enriched for skeletal muscle progenitors. *Muscle & nerve*.  
452 2011;43:741-50.
- 453 22. Gillies AR, Lieber RL: Structure and function of the skeletal muscle extracellular matrix. *Muscle &*  
454 *nerve*. 2011;44:318-31.
- 455 23. Telfer W, Busta A, Bonnemann C, Feldman E, Dowling J: Zebrafish models of collagen VI-related  
456 myopathies. *Human molecular genetics*. 2010;19:2433-44.
- 457 24. Capel AJ, Rimington RP, Fleming JW, Player DJ, Baker LA, Turner MC, et al.: Scalable 3D Printed  
458 Molds for Human Tissue Engineered Skeletal Muscle. *Frontiers in Bioengineering and Biotechnology*. 2019;7.
- 459 25. Player D, Martin N, Passey S, Sharples A, Mudera V, Lewis M: Acute mechanical overload increases  
460 IGF-I and MMP-9 mRNA in 3D tissue-engineered skeletal muscle. *Biotechnology letters*. 2014;36:1113-24.
- 461 26. Sharples AP, Polydorou I, Hughes DC, Owens DJ, Hughes TM, Stewart CE: Skeletal muscle cells  
462 possess a 'memory' of acute early life TNF- $\alpha$  exposure: role of epigenetic adaptation. *Biogerontology*.  
463 2016;17:603-17.
- 464 27. Smith A, Passey S, Greensmith L, Mudera V, Lewis M: Characterization and optimization of a simple,  
465 repeatable system for the long term in vitro culture of aligned myotubes in 3D. *Journal of cellular biochemistry*.  
466 2012;113:1044-53.
- 467 28. Smith AS, Passey SL, Martin NR, Player DJ, Mudera V, Greensmith L, et al.: Creating interactions  
468 between tissue-engineered skeletal muscle and the peripheral nervous system. *Cells Tissues Organs*.  
469 2016;202:143-58.
- 470 29. Sharples AP, Player DJ, Martin NR, Mudera V, Stewart CE, Lewis MP: Modelling in vivo skeletal  
471 muscle ageing in vitro using three-dimensional bioengineered constructs. *Aging cell*. 2012;11:986-95.
- 472 30. Bower NI, Johnston IA: Paralogs of Atlantic salmon myoblast determination factor genes are distinctly  
473 regulated in proliferating and differentiating myogenic cells. *American Journal of Physiology-Regulatory,*  
474 *Integrative and Comparative Physiology*. 2010;298:R1615-R26.
- 475 31. Desai K, Spikings E, Zhang T: Effect of chilling on *sox2*, *sox3* and *sox19a* gene expression in  
476 zebrafish (*Danio rerio*) embryos. *Cryobiology*. 2011;63:96-103.
- 477 32. Brady MA, Lewis MP, Mudera V: Synergy between myogenic and non-myogenic cells in a 3D  
478 tissue-engineered craniofacial skeletal muscle construct. *Journal of tissue engineering and regenerative*  
479 *medicine*. 2008;2:408-17.
- 480 33. Danoviz ME, Yablonka-Reuveni Z: Skeletal muscle satellite cells: background and methods for  
481 isolation and analysis in a primary culture system. In: *Myogenesis*. pp. 21-52. Springer, 2012.
- 482 34. Mudera V, Smith A, Brady M, Lewis M: The effect of cell density on the maturation and contractile  
483 ability of muscle derived cells in a 3D tissue-engineered skeletal muscle model and determination of the  
484 cellular and mechanical stimuli required for the synthesis of a postural phenotype. *Journal of cellular*  
485 *physiology*. 2010;225:646-53.
- 486 35. Montarras D, Morgan J, Collins C, Relaix F, Zaffran S, Cumanò A, et al.: Direct isolation of satellite  
487 cells for skeletal muscle regeneration. *Science*. 2005;309:2064-7.
- 488 36. Rouger K, Fornasari B, Armengol V, Jouvion G, Leroux I, Dubreil L, et al.: Progenitor cell isolation  
489 from muscle-derived cells based on adhesion properties. *Journal of Histochemistry & Cytochemistry*.  
490 2007;55:607-18.
- 491 37. Charge SB, Rudnicki MA: Cellular and molecular regulation of muscle regeneration. *Physiological*  
492 *reviews*. 2004;84:209-38.

- 493 38. Zhou Z, Bornemann A: MRF4 protein expression in regenerating rat muscle. *Journal of muscle*  
494 *research and cell motility*. 2001;22:311-6.
- 495 39. Kadi F, Johansson F, Johansson R, Sjöström M, Henriksson J: Effects of one bout of endurance  
496 exercise on the expression of myogenin in human quadriceps muscle. *Histochemistry and cell biology*.  
497 2004;121:329-34.
- 498 40. Allen D, Monke S, Talmadge R, Roy R, Edgerton V: Plasticity of myonuclear number in hypertrophied  
499 and atrophied mammalian skeletal muscle fibers. *Journal of Applied Physiology*. 1995;78:1969-76.
- 500 41. Petrella JK, Kim J-s, Mayhew DL, Cross JM, Bamman MM: Potent myofiber hypertrophy during  
501 resistance training in humans is associated with satellite cell-mediated myonuclear addition: a cluster analysis.  
502 *Journal of applied physiology*. 2008;104:1736-42.

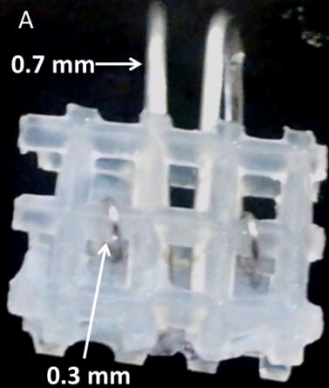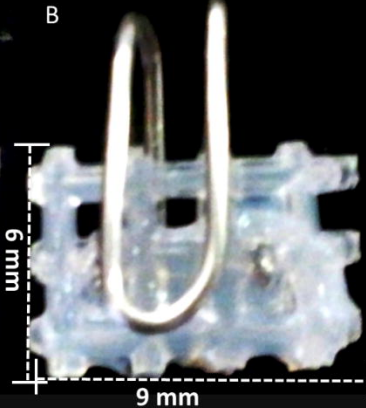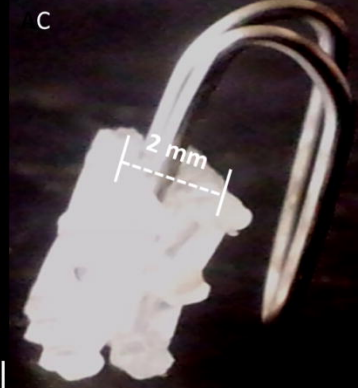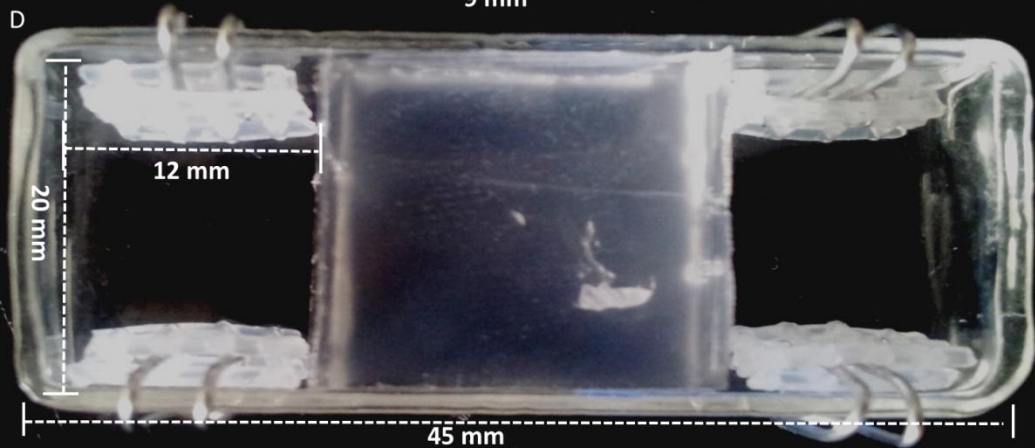

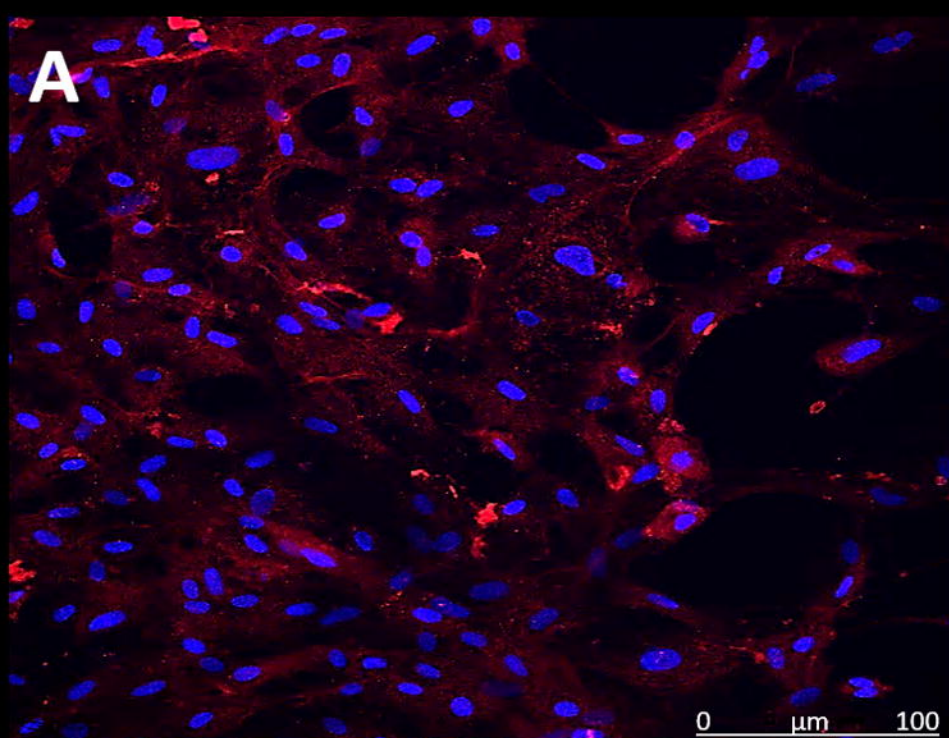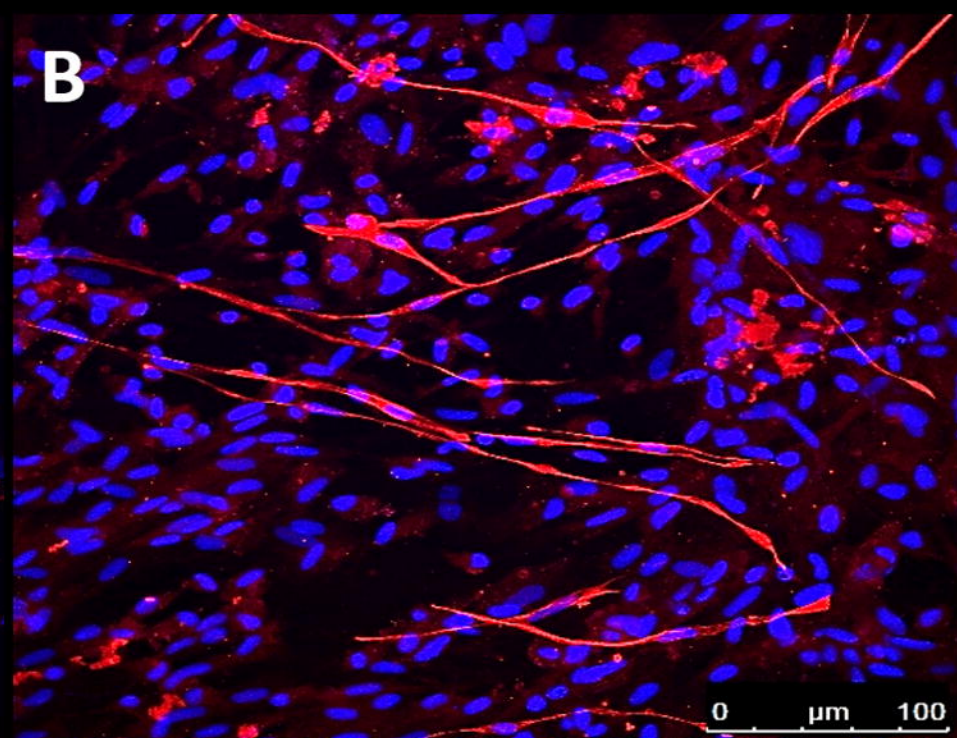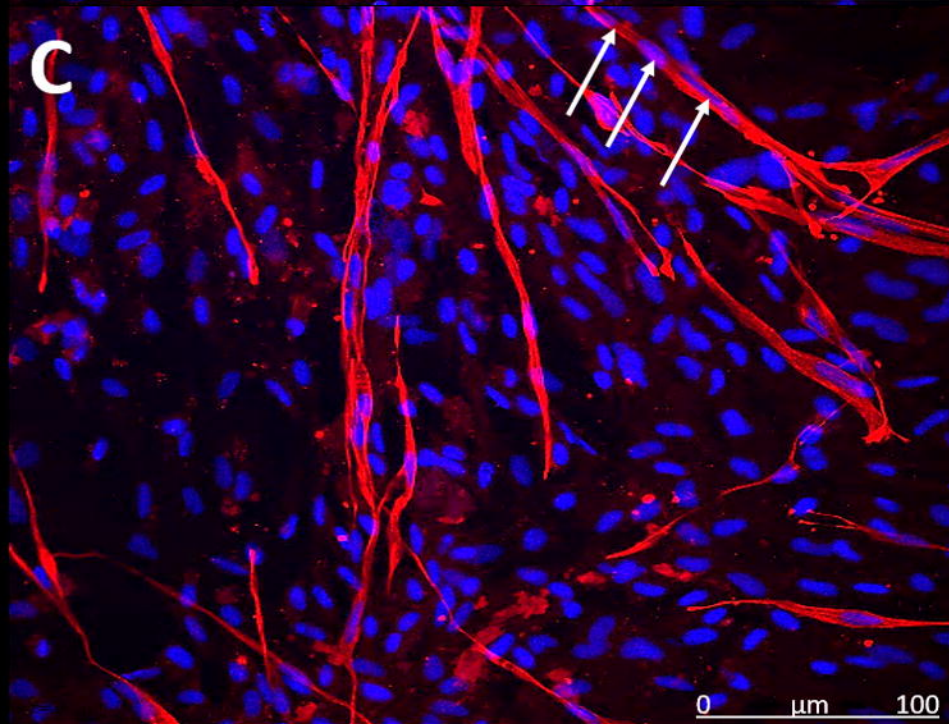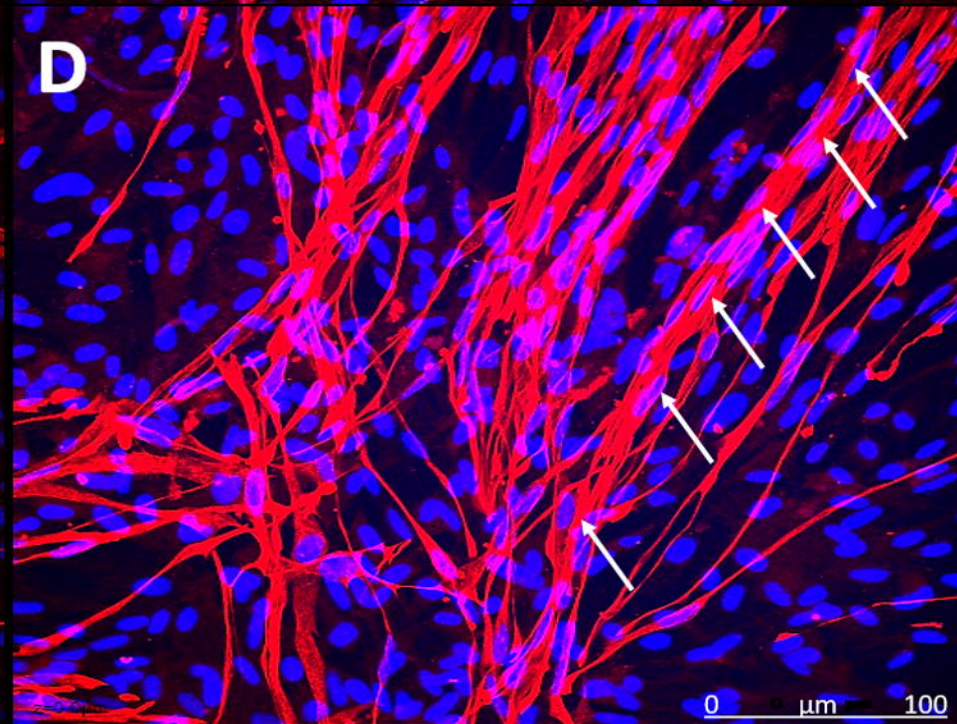



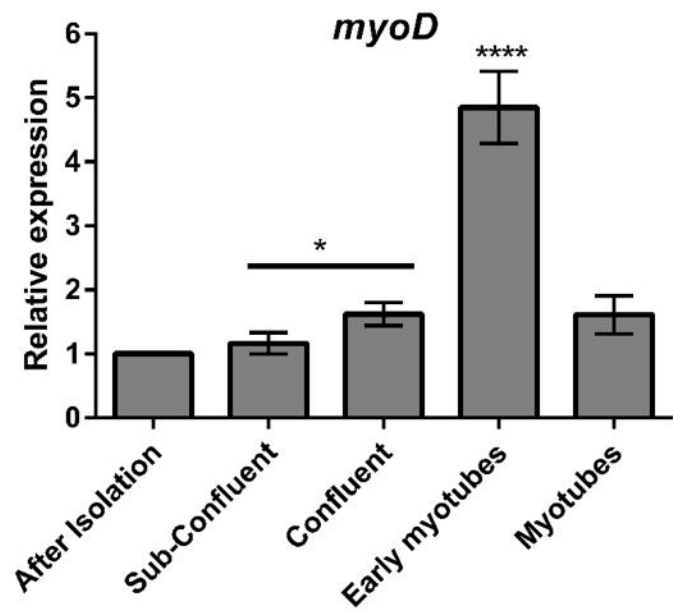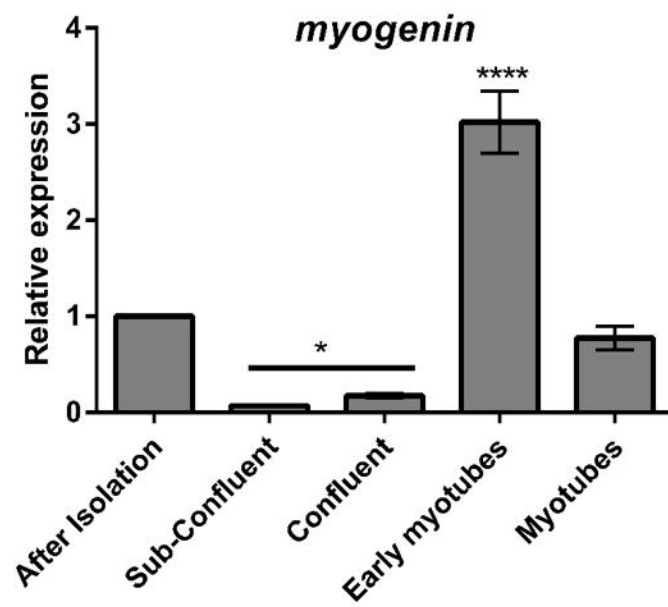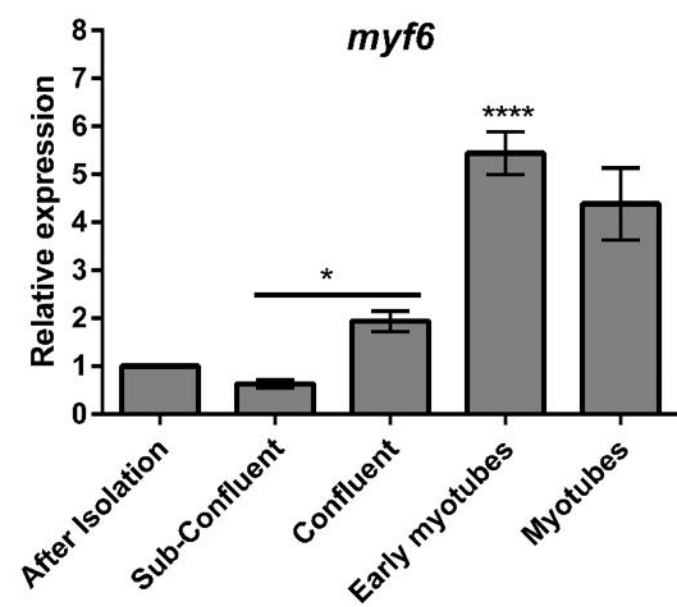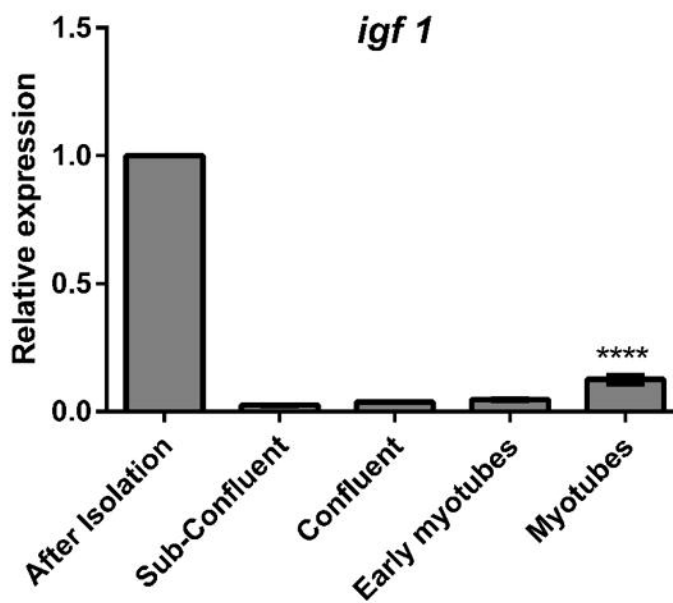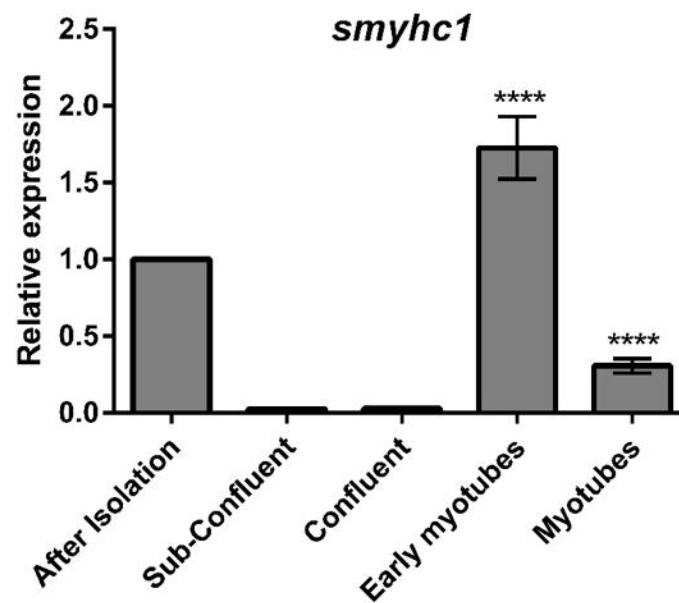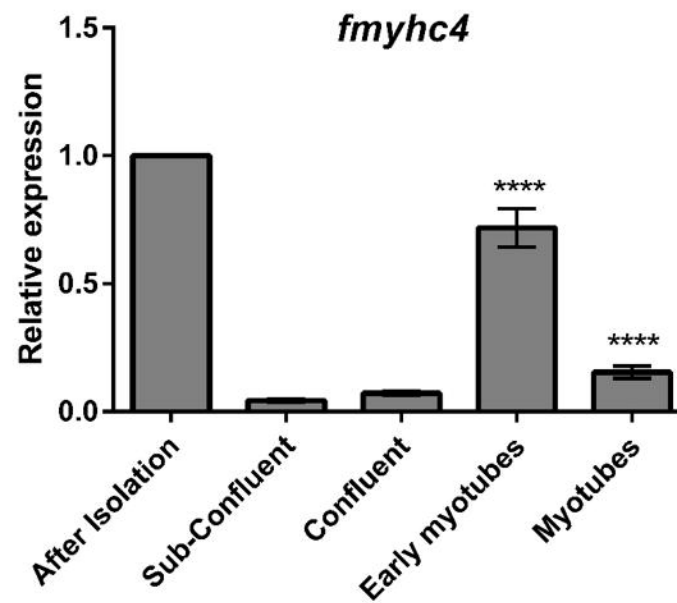

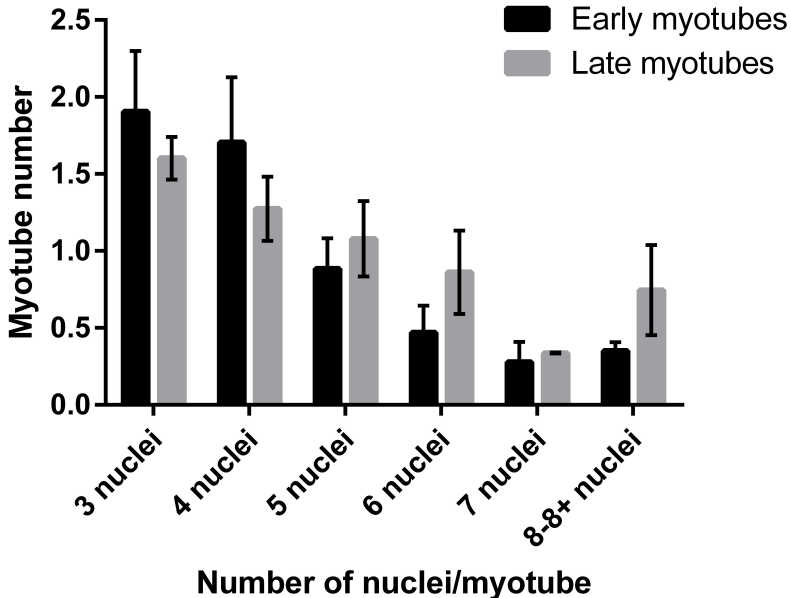

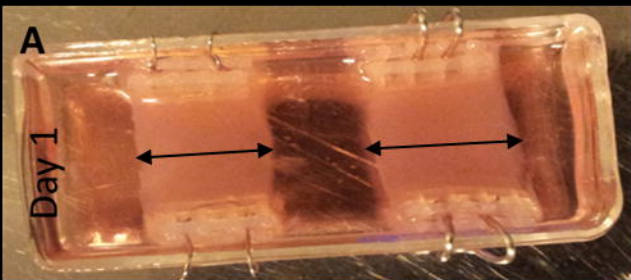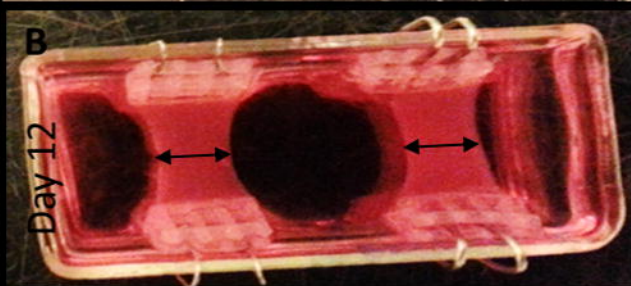

**C**

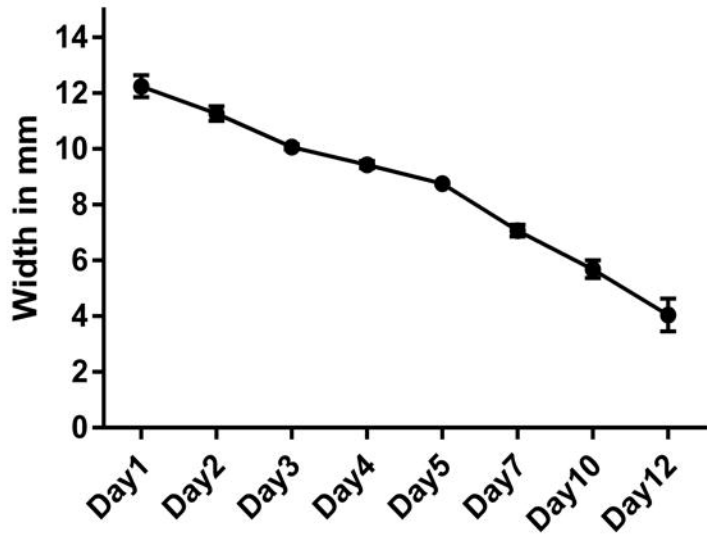

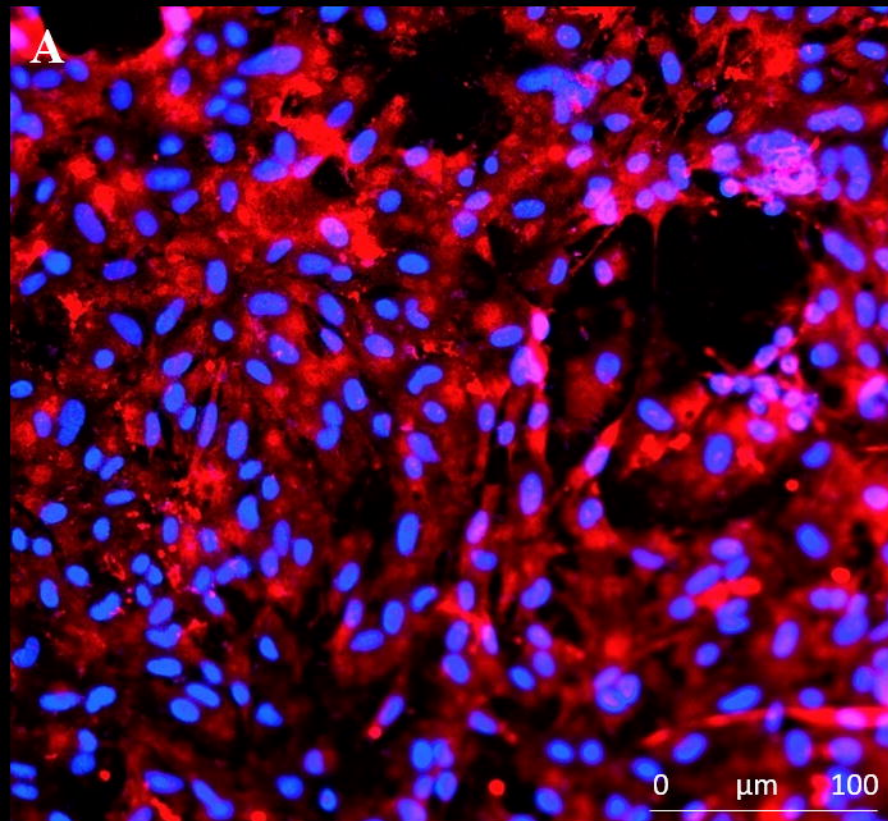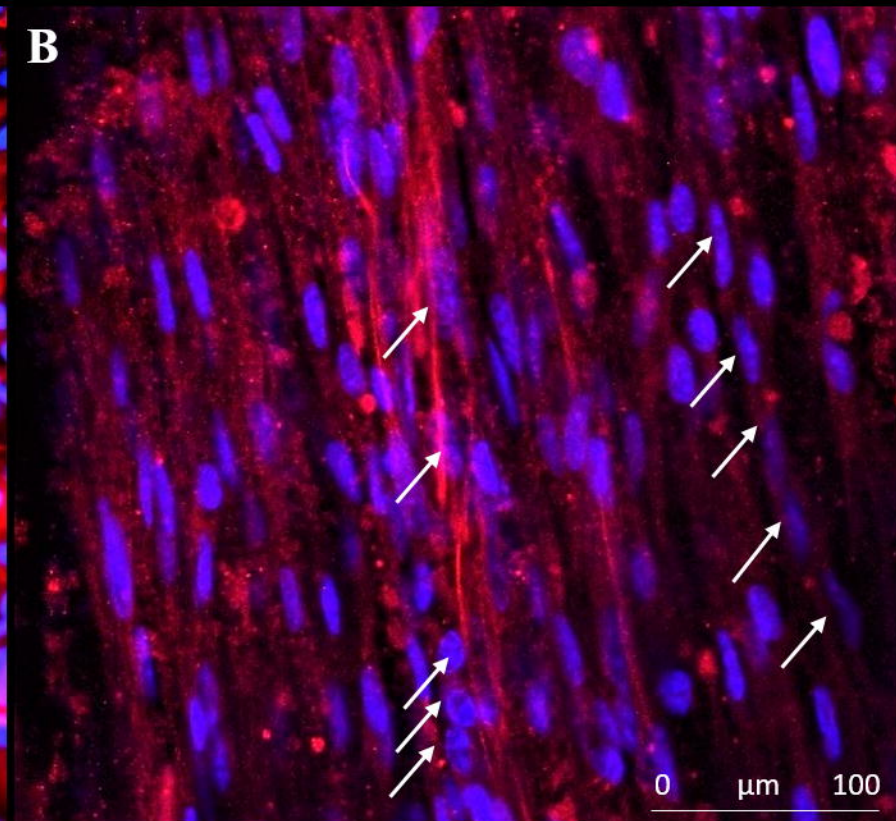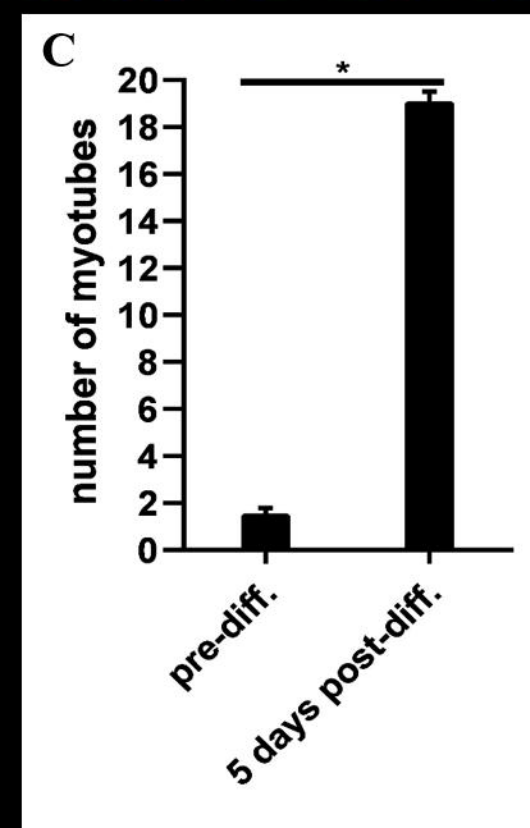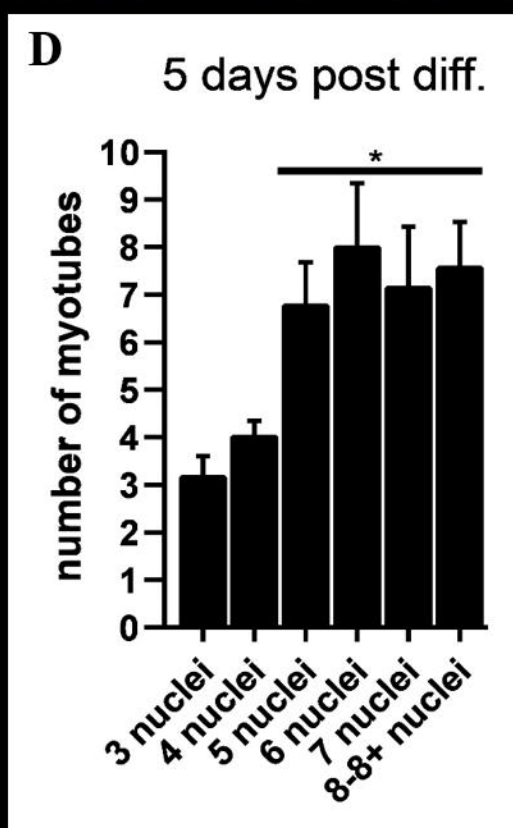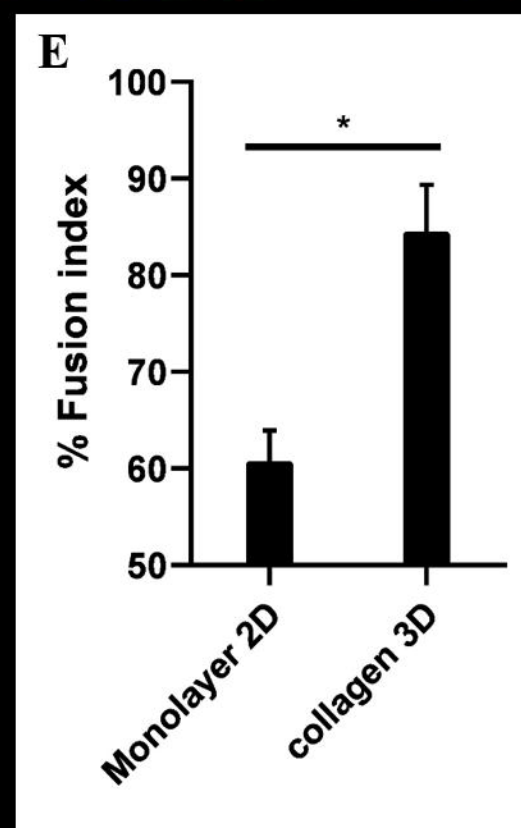

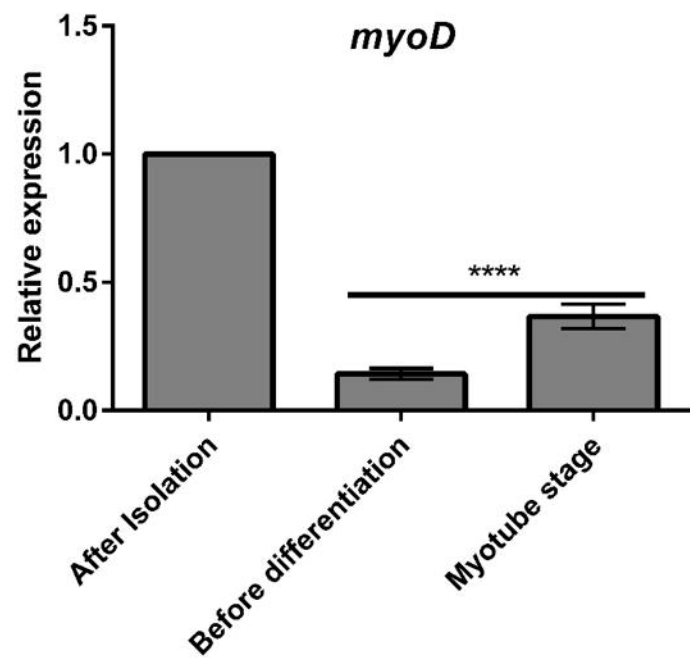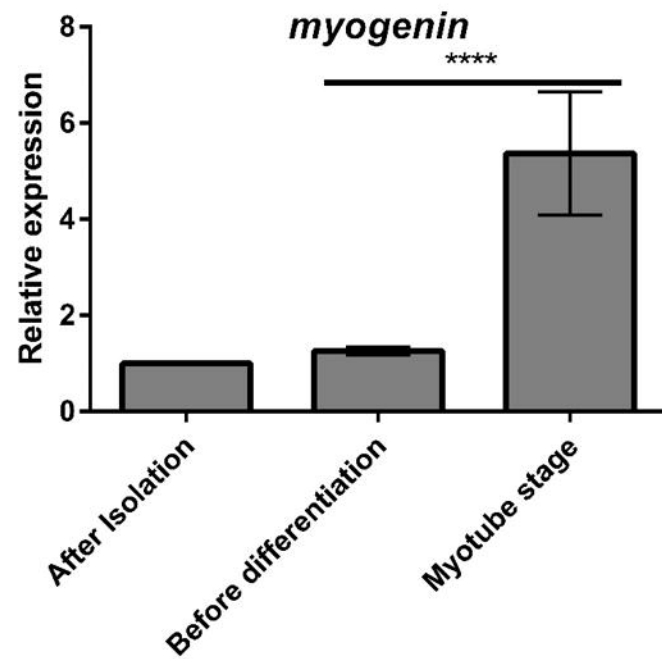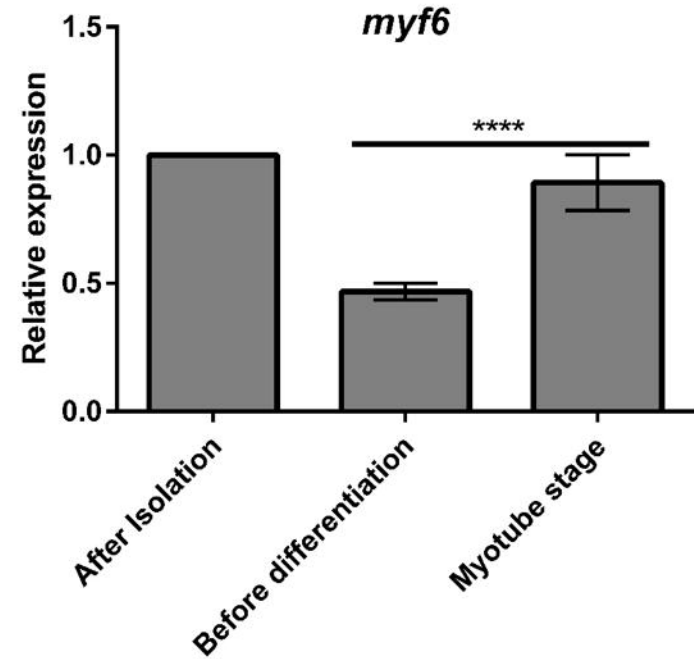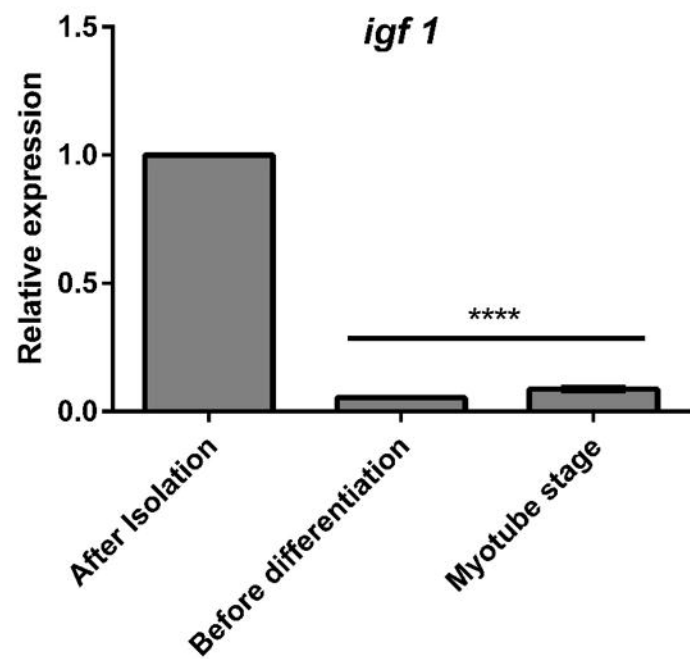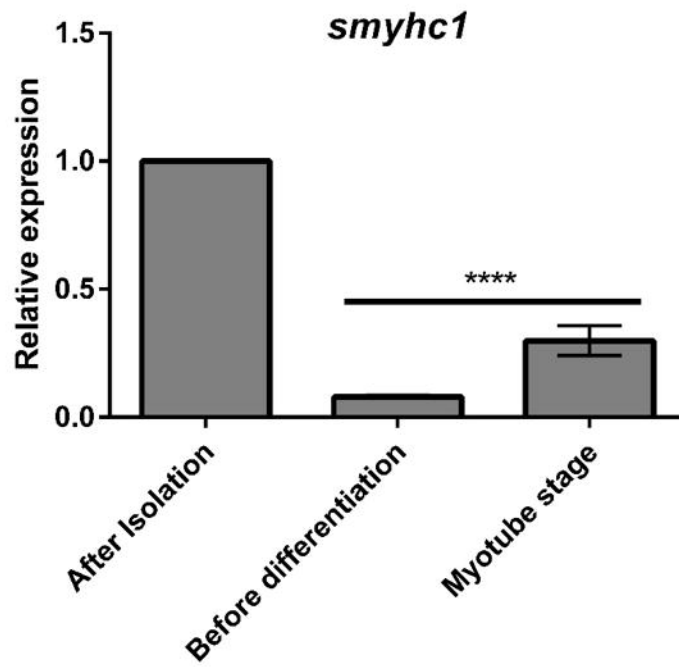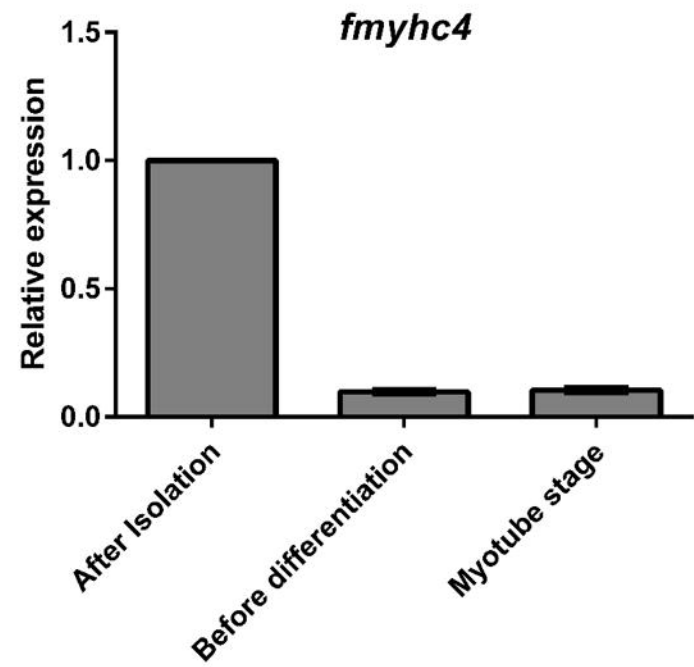

Source: http://biorxiv.org/content/10.1101/2020.12.10.419168v1.full.pdf
